# Supplementary material for: Identifying Novel Subtypes of Functional Gastrointestinal Disorder by Analyzing Nonlinear Structure in Integrative Biopsychosocial Questionnaire Data
Source: MDPI journal article supplement (doi:10.3390/jcm13102821), 2024-05-10
Supplement: s1 [file s1]

**Supplementary Table S1. KM questionnaire.**

| Questionnaire |                                                                                 |
|---------------|---------------------------------------------------------------------------------|
| 1             | My stool is loose.                                                              |
| 2             | I feel bloated or full without eating much, and it gets worse after eating.     |
| 3             | I feel listless and have no energy throughout my whole body.                    |
| 4             | The amount of food I eat has decreased.                                         |
| 5             | My face has been pale or yellowish.                                             |
| 6             | I don't have energy to talk, or I lose energy when I talk a lot.                |
| 7             | I've lost weight.                                                               |
| 8             | I tend to easily get tired, or I lose concentration or motivation easily.       |
| 9             | I have lost my appetite.                                                        |
| 10            | I have a discomfort in the upper stomach, but it gets better when it gets warm. |
| 11            | I often burp.                                                                   |
| 12            | I don't know the taste of food.                                                 |
| 13            | I feel pain when I press below the sternum.                                     |
| 14            | I feel bloated after meals.                                                     |
| 15            | I feel tired and don't want to move.                                            |
| 16            | I urinate frequently.                                                           |
| 17            | My body swells easily.                                                          |
| 18            | I have pain in the joints.                                                      |
| 19            | I frequently suffer from indigestion.                                           |
| 20            | I have a traveler's diarrhea.                                                   |
| 21            | I'm allergic to certain ingredients.                                            |
| 22            | I have a stomachache right after eating.                                        |
| 23            | I defecate right after eating.                                                  |
| 24            | I tend to deliver loose stools.                                                 |
| 25            | I gain weight gradually.                                                        |
| 26            | I fall into food coma.                                                          |
| 27            | I feel sick and nauseous.                                                       |
| 28            | I have an acid reflux                                                           |
| 29            | When did the symptoms appear?                                                   |
| 30            | Are you bold or delicate?                                                       |
| 31            | Are your actions quick or slow?                                                 |
| 32            | Are you active or passive?                                                      |
| 33            | Are you an extrovert or introvert?                                              |
| 34            | Are you masculine or feminine?                                                  |
| 35            | Do you get excited or remain calm?                                              |
| 36            | Do you digest well?                                                             |
| 37            | How is your appetite?                                                           |

- 
- 38 How much do you perspire?
  - 39 How do you feel after perspiration?
  - 40 Is it challenging to hold it in when the urge to defecate arises?
  - 41 How many times do you urinate in the middle of the night?
  - 42 Which do you dislike more, cold or heat?
  - 43 How is the temperature of your drinking water?
-

**Supplementary Table S2. Hyperparameter tuning using trustworthiness, silhouette coefficient, and accordance rate (average values of 100 times repeated).**

**ROME**

| Trustworthiness |      |     | Silhouette score |      |      |      |      | Accordance rate |      |      |      |      |      |
|-----------------|------|-----|------------------|------|------|------|------|-----------------|------|------|------|------|------|
|                 |      |     | 2                | 3    | 4    | 5    | 6    | 2               | 3    | 4    | 5    | 6    |      |
| 3               | 0.81 | 3   | 0.71             | 0.50 | 0.47 | 0.47 | 0.48 | 3               | 0.78 | 0.56 | 0.67 | 0.64 | 0.72 |
| 5               | 0.85 | 5   | 0.45             | 0.47 | 0.45 | 0.46 | 0.48 | 5               | 0.75 | 0.68 | 0.66 | 0.75 | 0.79 |
| 10              | 0.87 | 10  | 0.46             | 0.44 | 0.42 | 0.46 | 0.48 | 10              | 0.73 | 0.72 | 0.69 | 0.84 | 0.83 |
| 30              | 0.86 | 30  | 0.43             | 0.43 | 0.41 | 0.40 | 0.41 | 30              | 0.62 | 0.83 | 0.72 | 0.80 | 0.81 |
| 50              | 0.86 | 50  | 0.45             | 0.41 | 0.40 | 0.38 | 0.38 | 50              | 0.70 | 0.82 | 0.75 | 0.83 | 0.79 |
| 100             | 0.83 | 100 | 0.45             | 0.40 | 0.39 | 0.36 | 0.35 | 100             | 0.72 | 0.84 | 0.80 | 0.79 | 0.73 |

**KM**

|     |      |     | 2    | 3    | 4    | 5    | 6    |     |      |      | 2    | 3    | 4    | 5 | 6 |
|-----|------|-----|------|------|------|------|------|-----|------|------|------|------|------|---|---|
| 3   | 0.82 | 3   | 0.44 | 0.42 | 0.47 | 0.48 | 0.47 | 3   | 0.30 | 0.47 | 0.61 | 0.64 | 0.63 |   |   |
| 5   | 0.86 | 5   | 0.36 | 0.44 | 0.40 | 0.39 | 0.41 | 5   | 0.58 | 0.67 | 0.66 | 0.67 | 0.67 |   |   |
| 10  | 0.87 | 10  | 0.37 | 0.45 | 0.39 | 0.38 | 0.39 | 10  | 0.54 | 0.76 | 0.65 | 0.76 | 0.70 |   |   |
| 30  | 0.83 | 30  | 0.34 | 0.43 | 0.35 | 0.34 | 0.36 | 30  | 0.53 | 0.84 | 0.74 | 0.69 | 0.75 |   |   |
| 50  | 0.83 | 50  | 0.33 | 0.40 | 0.35 | 0.34 | 0.34 | 50  | 0.69 | 0.82 | 0.72 | 0.71 | 0.74 |   |   |
| 100 | 0.77 | 100 | 0.31 | 0.38 | 0.32 | 0.31 | 0.31 | 100 | 0.60 | 0.78 | 0.58 | 0.59 | 0.54 |   |   |

**SF-36**

|     |      |     | 2    | 3    | 4    | 5    | 6    |     | 2    | 3    | 4    | 5    | 6    |
|-----|------|-----|------|------|------|------|------|-----|------|------|------|------|------|
| 3   | 0.80 | 3   | 0.45 | 0.52 | 0.57 | 0.55 | 0.56 | 3   | 0.26 | 0.53 | 0.72 | 0.66 | 0.71 |
| 5   | 0.86 | 5   | 0.58 | 0.62 | 0.54 | 0.55 | 0.56 | 5   | 0.74 | 0.79 | 0.74 | 0.83 | 0.84 |
| 10  | 0.87 | 10  | 0.64 | 0.54 | 0.52 | 0.52 | 0.51 | 10  | 0.88 | 0.77 | 0.83 | 0.85 | 0.86 |
| 30  | 0.87 | 30  | 0.62 | 0.51 | 0.45 | 0.42 | 0.44 | 30  | 0.82 | 0.87 | 0.75 | 0.75 | 0.88 |
| 50  | 0.86 | 50  | 0.58 | 0.48 | 0.40 | 0.38 | 0.41 | 50  | 0.84 | 0.84 | 0.76 | 0.81 | 0.86 |
| 100 | 0.81 | 100 | 0.54 | 0.45 | 0.38 | 0.36 | 0.39 | 100 | 0.90 | 0.85 | 0.82 | 0.83 | 0.86 |

**Integrative questionnaire**

|     |      |     | 2     | 3    | 4    | 5    | 6    |     |      |      | 2    | 3    | 4    | 5 | 6 |
|-----|------|-----|-------|------|------|------|------|-----|------|------|------|------|------|---|---|
| 3   | 0.80 | 3   | 0.711 | 0.40 | 0.47 | 0.48 | 0.47 | 3   | 0.75 | 0.54 | 0.59 | 0.61 | 0.65 |   |   |
| 5   | 0.84 | 5   | 0.491 | 0.41 | 0.40 | 0.41 | 0.43 | 5   | 0.67 | 0.67 | 0.70 | 0.71 | 0.74 |   |   |
| 10  | 0.84 | 10  | 0.485 | 0.41 | 0.40 | 0.39 | 0.40 | 10  | 0.76 | 0.77 | 0.78 | 0.73 | 0.73 |   |   |
| 30  | 0.84 | 30  | 0.494 | 0.42 | 0.39 | 0.37 | 0.35 | 30  | 0.81 | 0.81 | 0.85 | 0.79 | 0.71 |   |   |
| 50  | 0.84 | 50  | 0.491 | 0.41 | 0.38 | 0.36 | 0.35 | 50  | 0.79 | 0.80 | 0.81 | 0.75 | 0.74 |   |   |
| 100 | 0.85 | 100 | 0.483 | 0.40 | 0.36 | 0.35 | 0.34 | 100 | 0.83 | 0.83 | 0.82 | 0.73 | 0.67 |   |   |

**Supplementary Table S3. Grid search space for the hyperparameter optimization for the ERTR and ERT models.**

| Model                                                                      | Hyperparameter    | Haperparameter values                                  |
|----------------------------------------------------------------------------|-------------------|--------------------------------------------------------|
| ERT                                                                        | n_estimators      | 200, 400, 600, 800, 1000, 1200, 1400, 1600, 1800, 2000 |
|                                                                            | max_depth         | 10, 20, 30, 40, 50, 60, 70, 80, 90, 100, 110, None     |
|                                                                            | min_samples_leaf  | 1, 2, 4                                                |
|                                                                            | min_samples_split | 2, 5, 10                                               |
| ERTR, extremely randomized tree regressor; ERT, extremely randomized trees |                   |                                                        |

**Supplementary Table S4.  $R^2$  values of KM and SF-36 variables arranged in an ascending order.**

| Feature name                    | $R^2$    | Feature name                      | $R^2$    |
|---------------------------------|----------|-----------------------------------|----------|
| times to urinate at night_1     | -0.07412 | urinate frequently                | 0.06894  |
| sensitive to the heat or cold_1 | -0.06943 | Don't sweat_2                     | 0.074804 |
| easygoing_1                     | -0.05301 | feeling after sweating_1          | 0.079494 |
| times to urinate at night_2     | -0.04715 | water temperature_0               | 0.08653  |
| sensitive to the heat or cold_2 | -0.04715 | difficult to hold it in_0         | 0.094738 |
| sensitive to the heat or cold_0 | -0.0366  | difficult to hold it in_2         | 0.094738 |
| easygoing_0                     | -0.0319  | body swell up                     | 0.098256 |
| introvert_0                     | -0.0319  | water temperature_2               | 0.100601 |
| easygoing_2                     | -0.02721 | rational_0                        | 0.106464 |
| timid_0                         | -0.02487 | stomachache after meals           | 0.127571 |
| sensitive_0                     | -0.01666 | can't taste food                  | 0.134607 |
| timid_1                         | -0.0108  | no appetite_2                     | 0.136952 |
| indigestion_1                   | -0.00845 | indigestion_0                     | 0.155714 |
| times to urinate at night_0     | -0.00493 | indigestion_2                     | 0.176821 |
| dont sweat_0                    | -0.00376 | bowel movements right after meals | 0.177994 |
| introvert_1                     | -0.00142 | belched frequently                | 0.181512 |
| rational_2                      | -0.00142 | lose weight                       | 0.212    |
| food hives                      | 0.006792 | indigestion frequently            | 0.213173 |
| rational_1                      | 0.006792 | pain relieved by warming up       | 0.229589 |
| womanly_0                       | 0.01031  | portions get smaller              | 0.23897  |
| water temperature_1             | 0.013827 | lose appetite                     | 0.240143 |
| womanly_1                       | 0.018518 | traveler's diarrhea               | 0.241315 |
| sensitive_1                     | 0.026726 | tenderness below sternum          | 0.260077 |
| sensitive_2                     | 0.026726 | food coma                         | 0.272976 |
| no appetite_1                   | 0.029071 | look pale                         | 0.303464 |
| womanly_2                       | 0.044315 | regurgitate acid                  | 0.30581  |

|                                     |          |                                                |          |
|-------------------------------------|----------|------------------------------------------------|----------|
| timid_2                             | 0.045488 | soft stool                                     | 0.358577 |
| feeling after sweating_0            | 0.046661 | no energy to talk                              | 0.396101 |
| no appetite_0                       | 0.047833 | feel lethargic                                 | 0.400792 |
| feeling after sweating_2            | 0.049006 | low on energy                                  | 0.451214 |
| introvert_2                         | 0.05956  | nausea.1                                       | 0.46294  |
| difficult to hold it in_1           | 0.05956  | feel bloated                                   | 0.50281  |
| dont sweat_1                        | 0.063077 | mushy stool                                    | 0.503982 |
| joint aching                        | 0.065423 | demotivated                                    | 0.503982 |
| gain weight                         | 0.065423 | feel bloated after meals                       | 0.509845 |
| onset of symptoms                   | 0.065423 |                                                |          |
| physical health_accomplished less   | -0.00728 | how much time interfere with social activities | 0.129917 |
| moderate activities                 | 0.012655 | walking one block                              | 0.141643 |
| physical health_cut down time       | 0.018518 | get sick easier                                | 0.153369 |
| expect health worse                 | 0.024381 | health excellent                               | 0.163923 |
| climbing several flights of stairs  | 0.031417 | general health_compared to 1 year ago          | 0.180339 |
| physical health_took extra effort   | 0.043143 | normal social activities                       | 0.182685 |
| vigorous activities                 | 0.045488 | feel calm                                      | 0.18972  |
| physical health_limited in the work | 0.051351 | feel worn out                                  | 0.199101 |
| walking more than a mile            | 0.056042 | feel so down                                   | 0.215518 |
| lifting or carrying groceries       | 0.060732 | bodily pain                                    | 0.226071 |
| bathing or dressing yourself        | 0.06425  | general health                                 | 0.23897  |
| emotional_cut down time             | 0.066595 | happy person                                   | 0.253042 |
| emotional_accomplished less         | 0.083012 | nervous person                                 | 0.263595 |
| walking several blocks              | 0.1135   | pain interfere with normal work                | 0.264768 |
| halthy as anybody                   | 0.117018 | feel downhearted                               | 0.282357 |

Purple, KM; green, SF-36.  $R^2$ ; adjusted  $R^2$  value.
